# Supplementary material for: Cross-Talks between RKIP and YY1 through a Multilevel Bioinformatics Pan-Cancer Analysis
Source: MDPI journal article supplement (doi:10.3390/cancers15204932), 2023-10-11
Supplement: s1 [file s1]

| Immune cell abbreviation | Gene set signature of immune cell                                                                                                                     |
|--------------------------|-------------------------------------------------------------------------------------------------------------------------------------------------------|
| CD4_naive                | CD2/CD3G/CD4/CD40LG/GIMAP6/GLG1/HMOX2/IL7R/ITK/LIMD2/LY9/NAA16/OBSCN/PACS1/PLCL1/RPL14/SEPT9/SNPH/TPP2/TRAF1/ZBTB40                                   |
| CD8_naive                | BLNK/CA14/CALY/CCDC87/CCR7/CD8A/CD8B/CRTAM/FXYD7/GJB4/GPR15/HTR1B/KERA/KRT1/LIN28A/MAN1C1/MOGAT2/NKTR/PSG11/RRH/SLC17A4/SMCP/SMR3B/TNKS2/TREM1/ZNF208 |
| Cytotoxic                | BLNK/CD8A/CD8B/GNLY/GZMA/GZMH/ITGAM/KLRK1/KNG1/PRF1/PSORS1C2/PTGDR2/SCN3A/TNFRSF10C                                                                   |
| Exhausted                | ADGRG1/AFAP1L2/CCND2/CD38/CD8A/CD8B/CHST12/CTLA4/DFNB31/EOMES/FUT8/ITM2A/LAG3/MYO1E/NDFIP2/PARK7/PDCD1/SIRPG/SNX9                                     |
| Tr1                      | CCR4/CD28/CD4/LAX1/TNFRSF4                                                                                                                            |
| nTreg                    | CD4/CD5/CTLA4/DUSP4/FOXP3/IL10RA/IL2RA/SIT1/STAT5A/TNFRSF9                                                                                            |
| iTreg                    | ATG2B/CCR3/CCR4/CCR8/CD28/CD5/CTLA4/FASLG/FOXP3/GALNT8/HS3ST3B1/ICOS/IL10RA/NFATC3/PPM1B/SIT1/STAT5A/TTN/ZFYVE9                                       |
| Th1                      | APBB2/CCL4/CTLA4/EIF2B2/GGT1/IFNG/IL2/LTA/MNAT1/SLAMF1/STAT1/SYNGR3/TACO1                                                                             |
| Th2                      | GATA3/GSTA4/GZMK/IL4/SLC25A44                                                                                                                         |
| Th17                     | CD4/IL17RA/IL1R1/IL21/RORC                                                                                                                            |

**Table S1.** The Table depicts the gene set signature of each immune cell used in ImmuCellAI analysis.
